# Supplementary material for: Which psychological, social and physical environmental characteristics predict changes in physical activity and sedentary behaviors during early retirement? A longitudinal study
Source: PeerJ. 2017 May 11;5:e3242. doi: 10.7717/peerj.3242 (PMC5429733; doi:10.7717/peerj.3242)
Supplement: Data S2 — Data file with raw data used for analyses. [file peerj-05-3242-s002.xlsx]

## Sheet: datafile
proefpersoon	pensioen	FUpensioen	penschange	dataverz	geslacht	geboorte	postcode	duurwoon	nationaliteit	lengte	gewicht	roker	beroep	diploma	motorvoert	burgstat	kinderen	kleinkind	pensioenm	pensioenj	pensioenj_2	maanden	jaren	duur_pensioen	soortpens	reden	werknapens	job1	kennis_10000	pedometer	slaap_gem	alggezh	gezh_nu	soccohes_1	soccohes_2	soccohes_3	soccohes_4	soccohes_5	socst_part_1	socst_fam_1	socst_vrie_1	socst_part_2	socst_fam_2	socst_vrie_2	voord_1	voord_2	voord_3	voord_4	voord_5
36	1	1	1	december	1	1949	9000	3	1	162	66	2	10	#NULL!	5	1	3	1	8	2011	#NULL!	4	1	16	1	#NULL!	1	2	1	2	8	4	3	4	3	3	2	3	4	3	2	2	2	2	5	5	5	4	4
401	1	1	1	mei	1	1947	9030	27	1	178	73	2	4	0	2	5	1	2	6	2012	#NULL!	6	0	11	1	#NULL!	1	1	2	2	10	3	3	5	4	4	4	4	#NULL!	#NULL!	#NULL!	1	1	1	5	1	5	#NULL!	#NULL!
296	1	2	1	mei	#NULL!	#NULL!	#NULL!	#NULL!	#NULL!	#NULL!	#NULL!	#NULL!	2	4	1	4	0	0	1	2013	#NULL!	11	-1	#NULL!	2	1	1	1	1	2	7	3	3	4	4	5	4	3	3	1	2	4	4	4	5	2	4	5	4
9	1	1	1	mei	0	1951	9000	3	1	180	82	1	2	2	1	3	3	0	7	2011	#NULL!	5	1	22	2	1	2	1	1	2	8	3	3	2	1	1	3	1	#NULL!	#NULL!	#NULL!	#NULL!	#NULL!	#NULL!	5	5	5	4	3
40	1	1	1	mei	0	1947	9031	33	1	169	89	2	6	4	3	1	1	2	3	2012	#NULL!	9	0	14	1	#NULL!	3	1	2	2	6	3	1	5	5	5	4	3	4	4	4	5	5	4	4	4	4	4	4
110	1	1	1	mei	0	1952	9032	6	1	174	73	2	7	4	1	1	3	6	9	2012	#NULL!	3	0	8	2	1	1	2	1	1	7	2	3	4	4	4	4	3	5	5	#NULL!	5	5	#NULL!	5	3	2	5	5
116	1	1	1	mei	0	1947	9050	42	1	181	110	2	6	3	1	1	1	1	9	2012	#NULL!	3	0	8	1	#NULL!	1	2	1	1	8	3	4	3	3	4	4	2	5	#NULL!	5	5	#NULL!	#NULL!	5	5	4	3	3
125	1	1	1	mei	0	1954	9051	24	1	173	78	2	11	4	2	1	2	3	9	2012	#NULL!	3	0	8	2	1	1	2	1	2	7	3	3	5	5	5	5	5	3	5	5	2	5	5	4	5	3	2	4
129	1	1	1	mei	0	1948	9050	1	1	187	72	1	6	3	0	1	0	0	6	2013	#NULL!	6	-1	#NULL!	1	#NULL!	1	2	#NULL!	#NULL!	7	3	3	4	4	4	4	4	#NULL!	#NULL!	#NULL!	#NULL!	#NULL!	#NULL!	#NULL!	#NULL!	#NULL!	#NULL!	#NULL!
133	1	1	1	december	0	1947	9051	6	1	172	80	2	7	4	1	1	2	4	2	2012	#NULL!	10	0	10	1	#NULL!	1	0	2	2	8	3	4	4	3	3	3	3	4	4	4	4	4	4	5	5	3	5	5
138	1	1	1	december	0	1952	9032	25	1	175	93	2	1	4	1	1	1	1	9	2012	#NULL!	3	0	#NULL!	1	#NULL!	1	2	2	2	8	2	4	5	3	4	4	3	4	4	4	4	4	4	5	5	5	2	4
146	1	1	1	december	0	1952	9050	8	1	172	91	2	7	3	1	1	2	1	3	2012	#NULL!	9	0	9	1	#NULL!	1	2	1	2	7	1	3	4	4	4	4	3	4	4	5	5	3	5	5	5	5	5	5
168	1	1	1	mei	0	1952	9030	17	1	178	80	2	2	4	2	1	0	0	1	2013	#NULL!	11	-1	#NULL!	1	#NULL!	2	1	1	2	8	2	3	3	3	3	3	3	4	3	3	3	3	3	4	4	4	3	3
196	1	1	1	mei	0	1952	9031	20	1	170	75	2	6	1	2	5	0	0	12	2012	#NULL!	0	0	#NULL!	1	#NULL!	1	2	2	2	10	3	2	3	2	3	3	3	5	#NULL!	5	#NULL!	#NULL!	5	4	4	3	4	5
204	1	1	1	december	0	1950	9000	32	1	183	86	2	2	4	2	1	1	3	1	2011	#NULL!	11	1	23	1	#NULL!	0	0	1	1	5	3	3	3	3	4	3	3	4	2	2	4	3	2	5	4	5	5	5
230	1	1	1	mei	0	1948	9000	30	1	180	92	2	9	5	1	1	1	2	2	2013	#NULL!	10	-1	#NULL!	1	#NULL!	1	2	1	1	9	3	2	4	3	4	3	3	5	#NULL!	#NULL!	#NULL!	#NULL!	#NULL!	5	5	5	3	3
242	1	1	1	mei	0	1953	9050	13	1	161	83	2	7	2	0	3	1	0	6	2013	#NULL!	6	-1	#NULL!	1	#NULL!	1	2	1	2	6	3	3	3	3	4	3	3	#NULL!	4	4	#NULL!	2	2	4	4	4	4	3
246	1	1	1	mei	0	1952	9000	6	1	169	65	2	2	4	1	4	0	0	10	2012	#NULL!	2	0	7	2	2	1	2	2	2	8	3	3	3	2	3	3	2	#NULL!	2	3	#NULL!	1	1	5	3	4	5	4
262	1	1	1	mei	0	1952	9000	27	1	189	94	1	6	3	2	1	1	1	3	2012	#NULL!	9	0	14	2	1	1	2	#NULL!	#NULL!	7	3	3	3	2	3	3	3	2	2	2	2	2	2	3	5	5	2	3
279	1	1	1	mei	0	1951	9031	5	1	167	67	2	7	4	2	5	2	1	10	2012	#NULL!	2	0	7	1	#NULL!	2	1	1	2	7	3	3	4	3	4	4	4	2	1	1	4	2	2	5	3	5	3	4
282	1	1	1	mei	0	1951	9000	10	1	176	94	1	2	2	1	3	3	1	11	2011	#NULL!	1	1	18	1	1	2	1	2	#NULL!	10	4	3	5	4	4	4	1	5	5	5	3	1	1	5	5	5	4	4
303	1	1	1	december	0	1950	9000	18	1	192	90	2	2	5	1	5	2	2	1	2011	#NULL!	11	1	23	2	1	1	2	1	2	8	2	3	4	3	5	5	4	5	5	3	5	3	2	5	2	1	4	4
306	1	1	1	mei	0	1952	9041	5	1	173	78	2	7	4	1	1	1	2	3	2012	#NULL!	9	0	14	1	#NULL!	2	1	2	2	8	2	3	4	3	4	5	4	4	4	2	5	3	2	4	4	5	3	5
336	1	1	1	december	0	1949	9030	2	1	180	91	2	7	5	1	1	1	1	2	2011	#NULL!	10	1	22	1	#NULL!	2	1	1	2	7	4	3	4	4	4	2	3	2	2	3	2	2	2	4	5	2	4	3
338	1	1	1	mei	0	1953	9040	35	1	174	73	2	2	5	1	4	0	0	3	2013	#NULL!	9	-1	#NULL!	1	1	2	2	1	2	7	1	3	3	3	4	4	2	#NULL!	4	4	#NULL!	#NULL!	4	4	4	4	4	5
341	1	1	1	mei	0	1947	9050	1	1	170	71	1	6	4	1	2	4	3	3	2012	#NULL!	9	0	14	1	#NULL!	2	2	1	2	6	4	3	3	2	3	4	3	#NULL!	3	3	#NULL!	#NULL!	#NULL!	3	3	3	4	3
342	1	1	1	mei	0	1951	9050	#NULL!	1	178	80	2	7	2	1	1	2	5	7	2011	#NULL!	5	1	22	1	1	1	2	1	2	8	3	3	3	2	3	4	3	2	2	2	#NULL!	#NULL!	#NULL!	3	3	3	2	3
428	1	1	1	mei	0	1953	9000	3	1	170	80	1	7	4	1	3	0	0	6	2013	#NULL!	6	-1	#NULL!	2	1	2	1	1	2	7	3	3	4	4	4	4	3	#NULL!	#NULL!	#NULL!	#NULL!	#NULL!	#NULL!	4	2	4	4	3
430	1	1	1	december	0	1954	9032	23	1	167	80	2	2	5	1	3	1	3	9	2012	#NULL!	3	0	#NULL!	2	1	1	2	1	2	10	4	4	3	2	4	4	4	5	5	5	3	2	3	5	5	5	5	3
431	1	1	1	december	0	1953	9040	1	1	184	84	2	6	4	1	1	2	0	6	2012	#NULL!	6	0	6	2	1	2	1	1	2	8	2	1	4	5	3	4	4	4	3	3	5	2	2	4	5	4	5	4
437	1	1	1	mei	0	1952	9000	11	1	178	78	2	2	2	1	2	2	3	11	2011	#NULL!	1	1	18	1	#NULL!	1	2	2	2	6	3	3	2	2	1	4	4	#NULL!	5	5	#NULL!	#NULL!	#NULL!	4	3	5	5	5
450	1	1	1	mei	0	1953	9030	13	1	172	73	2	7	5	1	1	1	2	7	2011	#NULL!	5	1	22	1	#NULL!	1	2	2	2	8	2	1	2	1	4	3	1	5	#NULL!	#NULL!	4	#NULL!	#NULL!	5	5	3	4	4
452	1	1	1	mei	0	1947	9000	13	1	175	78	2	6	1	0	3	2	7	11	2012	#NULL!	1	0	6	1	#NULL!	1	2	1	1	11	3	2	3	2	2	4	4	#NULL!	#NULL!	4	#NULL!	#NULL!	#NULL!	3	3	3	4	3
484	1	1	1	mei	0	1951	9040	34	1	179	93	2	7	5	1	1	2	2	3	2012	#NULL!	9	0	14	2	1	1	2	1	2	6	3	4	4	2	4	4	2	4	4	4	2	2	2	4	4	2	4	3
495	1	1	1	december	0	1954	9050	13	1	176	99	1	2	5	2	1	4	3	8	2012	#NULL!	4	0	#NULL!	2	1	2	0	2	2	10	4	2	4	3	3	4	3	5	5	5	3	3	3	5	5	5	5	5
499	1	1	1	mei	0	1952	9000	8	1	175	72	2	6	4	1	1	0	0	6	2011	#NULL!	6	1	23	2	1	2	1	1	2	8	3	3	5	3	5	5	2	5	2	4	5	2	3	5	5	2	5	5
545	1	1	1	december	0	1951	9041	15	1	180	90	2	6	4	1	1	1	0	7	2012	#NULL!	5	0	#NULL!	1	#NULL!	1	2	2	2	7	2	3	4	4	5	5	4	5	5	5	5	#NULL!	4	5	5	4	5	5
547	1	1	1	mei	0	1948	9000	37	1	176	86	2	2	2	1	1	4	5	4	2013	#NULL!	8	-1	#NULL!	1	#NULL!	1	2	1	2	7	2	3	3	2	4	4	3	3	2	2	5	2	2	4	4	3	3	5
549	1	1	1	mei	0	1953	9030	30	1	192	80	2	6	3	2	1	1	0	7	2011	#NULL!	5	1	22	2	1	1	2	1	2	8	3	2	4	3	4	4	3	2	2	2	4	2	2	4	2	4	2	3
2	1	1	1	december	1	1954	9031	8	1	165	52	2	3	5	2	5	3	3	7	2012	#NULL!	5	0	#NULL!	2	1	1	2	1	2	7	1	3	4	3	4	4	4	5	3	3	4	3	3	5	2	3	2	3
16	1	1	1	december	1	1954	9040	20	1	162	68	2	6	3	2	1	2	2	1	2012	#NULL!	11	0	11	2	1	1	2	1	1	7	2	3	4	4	5	4	3	5	3	4	5	5	5	5	3	5	5	5
22	1	1	1	mei	1	1952	9052	31	1	159	56	2	2	4	0	1	2	5	7	2012	#NULL!	5	0	10	1	#NULL!	1	2	1	2	8	3	3	3	4	4	4	4	1	1	1	3	2	2	5	4	5	5	5
28	1	1	1	mei	1	1951	9050	19	1	164	89	2	2	5	1	3	1	0	2	2012	#NULL!	10	0	15	2	1	1	2	1	2	7	3	3	4	3	4	4	3	#NULL!	4	4	#NULL!	2	3	5	5	4	4	3
42	1	1	1	december	1	1953	9030	16	1	166	59	2	2	4	1	1	1	0	2	2011	#NULL!	10	1	22	2	1	1	2	2	2	9	3	3	3	3	4	4	3	4	4	4	5	5	5	3	2	4	5	5
45	1	1	1	mei	1	1947	9040	10	1	157	#NULL!	2	7	1	1	2	1	0	12	2012	#NULL!	0	0	#NULL!	1	#NULL!	1	2	2	2	8	3	3	5	4	5	4	3	4	4	2	4	4	3	4	5	4	4	4
57	1	1	1	mei	1	1953	9040	27	1	164	75	2	2	5	1	1	2	1	4	2013	#NULL!	8	-1	#NULL!	1	#NULL!	1	2	#NULL!	#NULL!	8	3	1	4	3	4	5	3	5	4	3	3	2	2	4	4	3	3	3
61	1	1	1	december	1	1952	9032	35	1	176	71	2	2	5	1	1	2	0	5	2012	#NULL!	7	0	7	2	1	1	2	1	2	7	3	3	4	3	3	3	3	4	#NULL!	#NULL!	4	#NULL!	#NULL!	5	5	3	4	2
63	1	1	1	december	1	1947	9000	28	1	168	51	2	2	2	0	4	0	0	10	2012	#NULL!	2	0	#NULL!	1	#NULL!	1	2	1	1	7	2	3	4	3	3	3	3	#NULL!	1	1	#NULL!	5	5	5	5	5	5	5
81	1	1	1	mei	1	1952	9040	20	1	168	61	2	2	5	1	3	2	0	2	2013	#NULL!	10	-1	#NULL!	2	1	1	2	2	2	9	3	3	5	3	4	4	3	#NULL!	5	2	#NULL!	5	2	4	2	2	2	4
88	1	1	1	mei	1	1947	9050	1	1	158	58	2	10	4	1	1	4	0	6	2012	#NULL!	6	0	11	1	#NULL!	1	2	2	2	6	4	4	4	4	3	3	2	5	5	5	#NULL!	#NULL!	#NULL!	4	1	5	3	2
89	1	1	1	mei	1	1953	9041	4	1	170	82	2	7	5	1	5	2	4	12	2011	#NULL!	0	1	17	2	1	2	1	1	1	8	3	2	5	4	4	5	3	3	4	5	2	2	2	5	2	4	4	2
98	1	1	1	december	1	1950	9000	17	1	150	67	2	6	1	1	1	2	3	1	2012	#NULL!	11	0	11	1	2	1	2	1	2	7	3	2	5	4	5	5	5	#NULL!	#NULL!	#NULL!	#NULL!	#NULL!	#NULL!	4	4	4	2	2
107	1	1	1	december	1	1951	9030	2	1	165	83	2	8	5	0	3	2	0	1.5	2012	#NULL!	10.5	0	10.5	1	0	1	2	1	2	9	2	2	#NULL!	4	#NULL!	3	2	#NULL!	#NULL!	4	#NULL!	#NULL!	4	4	4	2	3	3
115	1	1	1	mei	1	1947	9030	17	1	158	#NULL!	2	2	5	1	1	2	4	5	2012	#NULL!	7	0	12	1	#NULL!	2	1	2	2	6	2	3	#NULL!	#NULL!	#NULL!	#NULL!	#NULL!	3	#NULL!	#NULL!	#NULL!	#NULL!	#NULL!	4	4	4	3	4
162	1	1	1	mei	1	1948	9000	40	1	166	70	2	4	4	1	1	1	1	6	2013	#NULL!	6	-1	#NULL!	1	#NULL!	3	1	1	2	8	3	1	3	3	3	3	3	2	1	1	#NULL!	1	1	5	4	2	5	4
175	1	1	1	december	1	1951	9000	2	1	165	70	2	7	5	2	1	2	2	7	2011	#NULL!	5	1	17	1	#NULL!	1	0	1	1	8	2	3	4	3	4	4	3	5	3	3	5	2	2	5	4	2	5	5
178	1	1	1	mei	1	1947	9032	19	1	159	55	2	2	2	1	1	2	2	3	2012	#NULL!	9	0	14	1	#NULL!	1	2	1	2	8	2	3	3	3	4	2	3	5	3	5	5	3	3	5	2	5	5	5
187	1	1	1	mei	1	1949	9000	#NULL!	1	159	55	2	2	4	1	3	2	0	1	2013	#NULL!	11	-1	#NULL!	1	#NULL!	1	2	1	2	7	2	3	3	1	3	2	1	5	5	5	5	5	5	5	2	2	5	5
198	1	1	1	mei	1	1948	9050	4	1	167	66	1	6	2	1	2	3	4	4	2013	#NULL!	8	-1	#NULL!	1	#NULL!	3	1	2	2	6	2	3	3	2	3	3	2	#NULL!	#NULL!	#NULL!	#NULL!	#NULL!	#NULL!	4	4	5	4	4
209	1	1	1	mei	1	1953	9030	28	1	178	100	2	2	4	1	1	2	3	11	2011	#NULL!	1	1	18	2	1	2	1	1	2	3	4	4	4	3	4	4	3	5	5	5	4	4	3	4	4	4	3	3
216	1	1	1	mei	1	1949	9050	32	1	170	98	2	6	2	0	1	1	1	12	2011	#NULL!	0	1	17	1	#NULL!	1	2	1	2	6	2	3	3	2	3	3	3	3	3	3	3	3	3	3	4	4	3	4
239	1	1	1	december	1	1947	9032	27	1	148	61	2	4	1	1	2	1	1	8	2012	#NULL!	4	0	#NULL!	1	#NULL!	2	1	1	2	6	3	4	3	3	3	3	3	#NULL!	#NULL!	3	#NULL!	#NULL!	3	4	4	4	4	3
240	1	1	1	mei	1	1951	9030	33	1	168	96	2	2	4	1	3	1	2	3	2013	#NULL!	9	-1	#NULL!	1	#NULL!	1	2	1	2	6	4	3	4	3	4	4	2	#NULL!	4	#NULL!	#NULL!	2	2	4	5	5	4	4
275	1	1	1	mei	1	1953	9000	#NULL!	1	172	64	2	7	5	2	1	2	0	2	2013	#NULL!	10	-1	#NULL!	1	#NULL!	2	1	1	2	8	3	3	5	4	4	4	3	4	4	4	5	4	3	5	5	3	3	3
284	1	1	1	mei	1	1953	9030	35	1	157	61	2	2	5	1	1	2	0	5	2013	#NULL!	7	-1	#NULL!	2	1	1	2	2	2	8	2	3	3	1	4	4	3	#NULL!	#NULL!	#NULL!	#NULL!	#NULL!	#NULL!	4	2	3	2	3
299	1	1	1	december	1	1952	9030	9	1	168	74	2	2	2	1	1	3	0	6	2012	#NULL!	6	0	6	1	#NULL!	1	0	1	2	7	3	2	3	3	2	4	4	3	3	3	2	2	3	5	5	5	#NULL!	3
322	1	1	1	mei	1	1953	9000	19	1	160	58	2	2	5	1	3	3	4	3	2013	#NULL!	9	-1	#NULL!	1	#NULL!	1	2	1	2	7	1	1	2	2	3	3	2	#NULL!	3	3	#NULL!	5	4	5	3	5	5	5
325	1	1	1	december	1	1951	9031	32	1	163	75	2	2	5	1	1	2	4	5	2011	#NULL!	7	1	19	2	1	2	0	1	1	8	1	3	3	2	3	3	2	3	2	2	3	1	1	5	5	5	5	5
327	1	1	1	mei	1	1948	9050	33	1	165	82	2	6	3	1	1	2	5	6	2013	#NULL!	6	-1	#NULL!	1	#NULL!	1	2	1	1	6	2	3	3	3	3	3	2	4	4	4	4	2	2	4	3	3	4	4
362	1	1	1	mei	1	1947	9030	42	1	167	62	2	11	1	1	1	3	7	4	2012	#NULL!	8	0	13	#NULL!	#NULL!	#NULL!	2	2	2	0	3	4	1	4	4	4	#NULL!	3	2	2	3	3	2	4	4	4	#NULL!	4
381	1	1	1	december	1	1950	9040	30	1	157	63	2	6	4	4	1	0	0	7	2011	#NULL!	5	1	17	1	#NULL!	1	2	1	2	8	3	3	4	4	5	5	5	3	#NULL!	1	3	#NULL!	3	5	3	5	5	5
394	1	1	1	mei	1	1947	9050	33	1	158	60	2	2	5	1	1	2	5	6	2012	#NULL!	6	0	11	1	#NULL!	1	2	1	2	7	3	3	4	3	4	3	3	4	1	1	5	#NULL!	5	4	4	4	5	5
395	1	1	1	mei	1	1952	9000	34	1	176	68	2	2	4	1	4	0	0	1	2013	#NULL!	11	-1	#NULL!	1	#NULL!	1	2	2	2	7	2	3	4	2	4	5	2	#NULL!	#NULL!	3	#NULL!	#NULL!	3	4	2	3	4	3
396	1	1	1	december	1	1948	9000	25	1	154	66	2	10	1	1	1	3	3	8	2011	#NULL!	4	1	16	1	#NULL!	1	2	1	2	8	3	3	3	3	4	3	3	1	1	1	3	1	1	4	4	4	4	4
400	1	1	1	mei	1	1948	9000	26	1	154	66	2	8	2	1	3	3	5	5	2012	#NULL!	7	0	12	1	#NULL!	1	2	1	2	8	2	3	5	5	5	#NULL!	1	1	1	1	3	4	4	5	4	5	5	5
402	1	1	1	mei	1	1948	9000	4	1	165	65	2	4	5	1	3	1	0	4	2013	#NULL!	8	-1	#NULL!	1	#NULL!	1	1	2	2	7	2	3	5	3	4	4	5	#NULL!	5	5	#NULL!	5	5	4	1	4	2	3
404	1	1	1	mei	1	1947	9000	23	1	168	78	2	11	4	1	3	0	0	1	2013	#NULL!	11	-1	#NULL!	1	#NULL!	2	2	1	2	9	3	3	4	4	4	4	2	#NULL!	4	4	#NULL!	4	4	4	3	4	4	4
416	1	1	1	mei	1	1952	9040	6	1	156	49	2	8	3	1	3	2	4	2	2013	#NULL!	10	-1	#NULL!	2	1	1	2	2	#NULL!	5	3	3	4	4	4	4	4	#NULL!	4	#NULL!	#NULL!	#NULL!	#NULL!	3	2	4	1	3
464	1	1	1	december	1	1950	9050	30	1	168	66	2	7	2	1	1	1	2	7	2012	#NULL!	5	0	#NULL!	1	#NULL!	2	2	2	2	7	2	3	4	3	4	3	3	4	4	#NULL!	4	#NULL!	#NULL!	5	4	2	3	3
476	1	1	1	mei	1	1954	9000	3	1	150	90	2	11	2	1	3	1	2	10	2012	#NULL!	2	0	7	2	1	1	2	1	2	8	2	3	1	1	1	3	3	#NULL!	#NULL!	#NULL!	#NULL!	#NULL!	#NULL!	3	3	3	4	3
507	1	1	1	december	1	1953	9040	8	1	175	83	2	6	4	1	1	1	0	1	2012	#NULL!	11	0	11	2	1	1	2	2	2	7	4	3	5	4	4	5	5	4	2	2	2	2	2	4	4	4	2	4
518	1	1	1	december	1	1951	9040	7	1	158	54	2	2	5	1	1	1	0	9	2011	#NULL!	3	1	15	1	#NULL!	1	2	1	2	7	2	3	4	3	5	4	3	1	1	3	1	1	4	4	4	2	5	5
550	1	1	1	mei	1	1950	9000	34	1	158	60	2	7	4	0	4	0	0	11	2012	#NULL!	1	0	6	2	1	1	2	1	2	6	4	2	3	2	#NULL!	#NULL!	#NULL!	#NULL!	#NULL!	5	#NULL!	#NULL!	4	5	3	4	4	4
85	1	1	1	mei	0	1947	9000	20	1	172	71	2	4	6	2	1	2	1	1	2013	#NULL!	11	-1	#NULL!	1	#NULL!	1	2	2	2	7	3	3	3	3	5	3	4	4	4	4	4	4	4	4	3	4	3	4
103	1	1	1	december	0	1950	9031	26	1	177	82	2	1	7	1	1	2	2	9	2011	#NULL!	3	1	15	1	#NULL!	2	1	1	1	7	4	1	5	4	5	4	4	5	4	4	5	2	4	5	3	3	5	4
130	1	1	1	mei	0	1952	9032	18	1	175	89	2	3	6	2	1	1	2	4	2013	#NULL!	8	-1	#NULL!	2	1	1	2	1	2	7	3	2	4	3	4	4	2	2	2	5	4	2	4	5	4	3	4	3
137	1	1	1	december	0	1952	9030	20	1	192	96	2	4	7	1	1	5	2	6	2012	#NULL!	6	0	6	1	#NULL!	2	1	1	2	9	3	3	2	2	4	#NULL!	#NULL!	3	3	#NULL!	1	1	#NULL!	5	5	3	5	4
149	1	1	1	december	0	1948	9050	15	1	172	80	2	2	6	1	1	1	1	5	2012	#NULL!	7	0	7	1	#NULL!	1	2	1	1	5	3	3	5	3	5	3	2	5	5	5	5	5	5	1	2	3	5	5
151	1	1	1	december	0	1952	9040	22	1	173	78	2	3	6	1	1	2	3	6	2012	#NULL!	6	0	6	2	2	1	2	2	2	7	3	3	5	4	4	4	4	5	5	5	5	5	5	5	4	5	5	5
155	1	1	1	mei	0	1950	9032	35	1	180	91	1	3	6	1	1	2	3	5	2012	#NULL!	7	0	12	2	1	1	2	1	1	6	2	2	5	5	5	5	3	4	4	4	4	4	4	4	3	5	4	5
170	1	1	1	december	0	1947	9030	16	1	176	75	2	2	6	1	1	2	3	10	2012	#NULL!	2	0	#NULL!	1	#NULL!	1	2	1	2	8	3	3	3	3	3	4	3	4	3	3	5	3	5	5	5	4	4	5
184	1	1	1	mei	0	1952	9031	26	1	178	106	2	1	6	3	1	2	0	5	2012	#NULL!	7	0	12	1	#NULL!	1	2	1	2	7	2	2	5	5	5	5	4	5	4	4	5	3	5	4	2	5	5	5
190	1	1	1	mei	0	1953	9031	27	1	181	116	2	3	7	1	1	3	3	4	2013	#NULL!	8	-1	#NULL!	2	1	1	2	1	1	7	3	2	5	5	5	5	5	5	5	5	4	4	5	5	5	5	5	5
191	1	1	1	mei	0	1953	9000	33	1	170	83	2	7	7	1	1	2	4	4	2013	#NULL!	8	-1	#NULL!	2	1	2	1	1	2	8	3	2	4	3	4	5	2	4	4	4	3	3	3	4	5	3	4	4
203	1	1	1	december	0	1950	9050	23	1	175	78	2	3	6	1	1	0	0	1	2011	#NULL!	11	1	23	1	#NULL!	3	1	2	2	8	2	3	3	2	4	3	3	5	#NULL!	#NULL!	5	#NULL!	#NULL!	4	4	5	2	5
205	1	1	1	december	0	1051	9041	#NULL!	1	180	#NULL!	2	2	6	1	5	2	0	#NULL!	2011	#NULL!	#NULL!	1	#NULL!	2	1	2	2	1	2	9	3	3	4	4	5	4	3	4	#NULL!	#NULL!	3	#NULL!	#NULL!	5	3	3	3	3
206	1	1	1	mei	0	1950	9032	31	1	170	66	1	1	7	2	1	2	3	10	2011	#NULL!	2	1	19	1	#NULL!	1	1	1	2	9	2	2	3	3	3	4	2	4	2	2	3	1	3	5	5	3	4	3
211	1	1	1	december	0	1951	9031	26	1	162	63	2	7	6	1	1	2	2	1	2012	#NULL!	11	0	11	2	1	1	1	1	2	7	3	2	4	4	4	4	4	5	4	4	5	5	4	5	2	2	5	5
218	1	1	1	december	0	1951	9032	21	1	178	85	2	4	6	2	1	1	2	12	2011	#NULL!	0	1	12	1	#NULL!	1	2	1	1	5	4	3	4	2	3	3	3	1	1	4	1	1	4	4	3	2	1	2
220	1	1	1	mei	0	1952	9030	24	1	176	77	2	1	6	1	1	2	3	4	2012	#NULL!	8	0	13	1	#NULL!	1	2	1	2	7	2	3	4	3	3	4	3	5	2	5	5	2	5	5	5	4	5	4
228	1	1	1	mei	0	1952	9000	29	1	188	78	1	3	7	1	1	3	4	10	2012	#NULL!	2	0	7	1	#NULL!	2	1	2	2	8	3	3	5	5	5	5	5	4	4	4	4	4	4	5	1	3	1	5
229	1	1	1	mei	0	1950	9052	25	1	176	78	2	4	7	2	1	2	4	7	2012	#NULL!	5	0	10	2	1	1	2	2	1	8	2	3	4	3	4	4	3	4	3	3	3	2	2	4	4	3	2	3
247	1	1	1	mei	0	1949	9000	30	1	178	81	1	3	6	1	2	2	0	12	2011	#NULL!	0	1	17	2	1	1	2	1	2	8	3	3	5	4	4	2	3	#NULL!	#NULL!	#NULL!	#NULL!	#NULL!	#NULL!	5	5	4	5	4
256	1	1	1	mei	0	1950	9030	35	1	168	61	2	7	7	1	1	2	0	6	2012	#NULL!	6	0	11	1	#NULL!	1	2	1	2	8	2	3	5	4	5	4	4	5	5	5	5	5	5	5	4	5	5	5
258	1	1	1	mei	0	1950	9000	2	2	186	78	2	7	7	1	3	5	2	3	2012	#NULL!	9	0	14	1	#NULL!	1	2	1	2	7	1	3	2	1	3	4	4	2	2	2	2	2	2	4	4	2	4	2
263	1	1	1	december	0	1947	9050	36	1	182	90	2	2	6	2	1	2	2	8	2012	#NULL!	4	0	#NULL!	1	#NULL!	1	2	2	2	8	2	3	5	5	5	5	5	5	5	5	5	5	5	5	4	5	5	5
270	1	1	1	mei	0	1951	9041	28	1	164	79	2	7	7	2	1	5	8	12	2011	#NULL!	0	1	17	2	1	3	1	1	1	8	3	2	3	2	4	5	2	5	5	5	5	5	5	5	5	3	4	4
271	1	1	1	mei	0	1949	9031	35	1	181	77	2	1	6	1	1	2	2	10	2011	#NULL!	2	1	19	1	#NULL!	2	1	1	1	7	3	3	4	3	4	4	3	4	4	4	5	4	4	4	3	4	4	4
287	1	1	1	mei	0	1952	9000	36	1	171	60	2	1	7	1	1	2	4	9	2012	#NULL!	3	0	8	1	#NULL!	2	1	1	2	8	1	3	3	2	3	3	2	5	#NULL!	#NULL!	4	4	5	5	3	4	4	5
307	1	1	1	december	0	1948	9000	#NULL!	1	182	83.5	2	3	6	5	1	2	2	2	2013	#NULL!	10	-1	#NULL!	2	1	1	2	2	2	6	3	3	4	4	5	4	3	5	3	3	5	2	2	3	5	2	2	3
345	1	1	1	mei	0	1951	9031	20	1	165	87	1	11	7	3	1	0	0	9	2011	#NULL!	3	1	20	2	1	1	2	1	2	7	3	2	5	5	5	5	4	5	4	4	5	3	3	5	4	2	5	5
370	1	1	1	mei	0	1951	9040	10	1	170	79	2	2	6	1	1	3	6	5	2011	#NULL!	7	1	24	1	#NULL!	1	2	1	2	6	5	4	4	4	5	4	3	#NULL!	#NULL!	#NULL!	#NULL!	#NULL!	#NULL!	4	4	4	3	4
429	1	1	1	mei	0	1950	9040	25	1	163	74	2	4	6	2	1	2	5	5	2012	#NULL!	7	0	12	2	1	1	2	1	2	9	3	3	5	4	5	5	3	5	4	5	5	2	5	5	3	4	4	4
435	1	1	1	mei	0	1951	9000	26	1	173	80	2	7	7	1	1	1	1	1	2012	#NULL!	11	0	16	2	1	3	2	2	2	8	3	3	5	4	4	3	3	4	3	4	3	2	2	5	5	3	4	2
436	1	1	1	december	0	1951	9000	6	1	179	81	2	7	6	1	1	0	0	1	2012	#NULL!	11	0	11	1	#NULL!	2	1	2	2	7	2	3	4	4	4	1	3	1	1	2	#NULL!	5	5	5	3	5	5	5
438	1	1	1	december	0	1951	9031	34	1	182	92	2	3	7	1	1	1	2	12	2010	#NULL!	0	2	24	2	1	1	2	2	2	8	2	3	5	3	4	5	4	5	4	4	4	4	5	5	2	5	5	5
439	1	2	1	mei	0	1950	9032	23	1	186	87	2	2	7	2	1	2	0	8	2012	#NULL!	4	0	9	2	2	1	2	2	2	8	3	2	5	4	4	4	3	5	5	5	5	5	5	5	4	3	5	4
440	1	1	1	december	0	1952	9031	30	1	184	86	2	1	7	1	1	2	2	6	2012	#NULL!	6	0	6	2	1	2	1	1	2	8	3	3	5	5	5	5	5	4	#NULL!	#NULL!	4	#NULL!	#NULL!	5	5	2	5	4
442	1	1	1	december	0	1947	9000	12	1	178	70	2	5	7	2	1	3	5	8	2012	#NULL!	4	0	#NULL!	1	#NULL!	2	2	1	2	7	3	4	3	2	5	1	4	5	5	5	5	5	5	5	3	5	5	5
443	1	1	1	mei	0	1952	9051	2	1	172	83	2	7	6	2	5	0	0	6	2012	#NULL!	6	0	11	1	#NULL!	1	2	1	1	7	4	4	4	3	4	5	4	5	5	4	5	3	3	5	5	4	5	5
446	1	1	1	december	0	1950	9000	5	1	175	95	2	2	7	1	2	2	1	12	2010	#NULL!	0	2	24	1	#NULL!	2	1	2	2	7	4	2	3	3	3	3	3	#NULL!	5	5	#NULL!	1	1	5	5	1	1	4
451	1	1	1	mei	0	1952	9000	32	1	176	79	2	1	6	2	1	3	3	4	2012	#NULL!	8	0	13	1	#NULL!	2	1	1	2	7	2	3	3	2	3	3	2	5	5	5	5	5	5	5	4	5	5	5
460	1	1	1	december	0	1950	9032	33	1	173	76	2	3	6	1	1	3	2	6	2012	#NULL!	6	0	6	1	#NULL!	1	0	1	1	7	2	2	5	4	4	4	3	2	2	2	2	2	2	3	5	3	2	2
480	1	1	1	mei	0	1953	9040	27	1	184	127	1	3	7	1	5	0	0	10	2011	#NULL!	2	1	19	2	1	1	2	1	1	6	4	3	4	4	5	4	4	5	#NULL!	5	5	#NULL!	4	4	4	3	1	3
483	1	1	1	mei	0	1951	9052	29	1	161	70	2	7	6	2	1	0	0	5	2011	#NULL!	7	1	24	2	1	1	2	1	2	8.5	2	3	4	4	4	4	4	5	#NULL!	4	5	#NULL!	5	5	5	4	5	5
485	1	1	1	mei	0	1947	9032	20	1	166	60	2	7	7	1	4	2	1	6	2012	#NULL!	6	0	11	1	#NULL!	3	2	1	2	7	2	3	4	3	4	4	4	3	5	4	3	5	4	5	3	4	5	5
488	1	1	1	mei	0	1947	9041	16	1	172	83	2	2	6	1	1	5	14	4	2012	#NULL!	8	0	13	1	#NULL!	2	1	#NULL!	#NULL!	6	3	3	4	4	4	5	4	2	2	2	5	5	5	4	4	4	4	4
491	1	1	1	mei	0	1947	9050	23	1	178	75	2	3	6	1	1	3	0	10	2012	#NULL!	2	0	7	1	2	2	1	1	2	8	3	3	5	3	5	2	5	5	5	5	5	5	5	5	5	4	4	5
519	1	1	1	december	0	1948	9050	7	1	175	74	2	3	6	2	5	2	5	7	2011	#NULL!	5	1	17	2	1	1	2	1	2	8	2	3	4	4	4	4	3	2	2	2	5	5	5	5	4	5	5	5
527	1	1	1	december	0	1951	9031	21	1	179	89	2	7	6	1	2	2	3	6	2013	#NULL!	6	-1	#NULL!	1	#NULL!	1	2	1	2	7	3	2	5	4	4	3	3	#NULL!	5	5	#NULL!	5	4	5	5	5	5	5
531	1	1	1	mei	0	1950	9030	13	1	165	67	2	7	6	0	1	3	5	8	2012	#NULL!	4	0	9	1	#NULL!	2	1	1	2	8	2	2	2	1	3	2	2	1	1	1	5	4	5	5	3	5	4	5
541	1	1	1	mei	0	1948	9000	6	1	180	80	1	3	7	1	3	5	8	11	2012	#NULL!	1	0	6	1	#NULL!	2	1	1	1	8	2	3	3	1	3	3	3	#NULL!	3	3	#NULL!	#NULL!	#NULL!	4	2	3	1	3
542	1	1	1	december	0	1950	9000	14	1	158	68	2	2	6	0	1	0	0	4	2012	#NULL!	8	0	8	2	1	1	2	2	2	7	4	4	3	2	3	3	3	4	4	4	4	1	1	3	4	4	4	3
553	1	1	1	mei	0	1947	9040	10	1	174	71	2	3	6	2	3	3	3	9	2012	#NULL!	3	0	8	1	#NULL!	2	1	1	2	7	2	3	5	5	5	4	4	#NULL!	5	5	#NULL!	5	5	5	4	4	4	4
1	1	1	1	mei	1	1948	9000	17	1	162	60	2	11	6	1	1	3	3	12	2011	#NULL!	0	1	17	1	1	1	2	1	2	8	3	3	3	3	2	3	1	2	2	2	5	1	1	4	3	5	5	5
12	1	1	1	mei	1	1948	9000	16	1	160	60	2	3	6	0	3	1	0	6	2011	#NULL!	6	1	23	1	#NULL!	2	1	1	2	7	3	4	3	2	4	5	3	#NULL!	3	5	#NULL!	1	5	5	5	3	5	5
17	1	1	1	mei	1	1952	9000	4	1	157	69	2	1	7	1	3	2	1	3	2012	#NULL!	9	0	14	1	#NULL!	1	2	2	2	8	3	3	5	4	4	5	5	#NULL!	4	4	#NULL!	3	4	5	3	4	5	5
23	1	1	1	mei	1	1952	9032	23	1	158	55	2	1	6	2	5	2	3	9	2012	#NULL!	3	0	8	1	#NULL!	1	2	1	2	7	2	2	4	4	4	4	3	5	5	5	5	5	4	5	2	4	4	4
25	1	1	1	mei	1	1949	9050	32	1	164	63	2	2	6	2	1	1	0	10	2011	#NULL!	2	1	19	2	1	1	2	1	2	6	3	3	4	3	4	4	4	3	#NULL!	#NULL!	1	1	1	3	3	4	5	3
26	1	1	1	mei	1	1953	9032	31	1	167	58	2	1	6	1	1	3	7	7	2011	#NULL!	5	1	22	1	1	2	1	1	2	6	2	1	2	1	2	3	2	5	5	5	5	5	5	5	3	3	5	5
32	1	1	1	mei	1	1950	9000	8	1	155	55	2	5	7	1	1	1	0	2	2012	#NULL!	10	0	15	2	1	2	1	1	2	8	3	2	5	4	3	4	2	5	5	4	5	5	#NULL!	5	5	3	4	5
33	1	1	1	mei	1	1952	9030	13	1	160	53	2	1	6	1	1	2	4	3	2012	#NULL!	9	0	14	2	1	1	2	1	1	8	3	4	5	5	5	5	5	5	4	4	5	2	2	4	4	5	5	5
46	1	1	1	december	1	1951	9000	10	1	174	69	2	1	7	1	3	2	2	12	2011	#NULL!	0	1	12	1	#NULL!	1	0	2	2	9	2	3	4	3	5	4	4	#NULL!	#NULL!	#NULL!	#NULL!	#NULL!	#NULL!	5	2	3	4	5
58	1	1	1	mei	1	1953	9000	6	1	167	85	2	1	6	3	5	0	0	7	2013	#NULL!	5	-1	#NULL!	1	#NULL!	1	2	1	1	8	3	2	5	5	5	5	4	#NULL!	5	5	#NULL!	4	4	5	5	5	4	5
64	1	1	1	december	1	1952	9000	4	1	168	70	2	1	6	1	3	2	1	12	2012	#NULL!	0	0	#NULL!	1	#NULL!	2	2	1	1	7	2	2	4	3	4	4	3	#NULL!	#NULL!	#NULL!	#NULL!	#NULL!	#NULL!	5	4	3	5	2
68	1	1	1	mei	1	1950	9052	35	1	163	54	2	3	7	2	1	2	3	2	2012	#NULL!	10	0	15	2	1	2	1	1	2	8	3	4	5	3	4	5	2	3	3	3	3	3	3	4	2	3	3	5
78	1	1	1	december	1	1951	9000	25	1	175	90	2	1	6	1	4	0	0	10	2012	#NULL!	2	0	#NULL!	1	#NULL!	0	0	1	2	6	2	3	#NULL!	2	#NULL!	#NULL!	#NULL!	#NULL!	#NULL!	#NULL!	#NULL!	#NULL!	#NULL!	5	1	4	2	4
90	1	1	1	december	1	1953	9000	32	1	160	49	2	1	7	2	1	0	0	6	2011	#NULL!	6	1	18	1	1	1	2	1	1	0	3	1	5	5	5	5	3	1	1	1	5	#NULL!	#NULL!	5	4	3	5	5
113	1	1	1	december	1	1951	9031	22	1	169	76	2	2	7	1	4	0	0	5	2012	#NULL!	7	0	7	2	2	2	1	2	2	8	4	4	5	5	5	5	4	#NULL!	2	2	#NULL!	1	2	4	2	4	1	5
127	1	1	1	mei	1	1952	9000	3	1	168	68	2	1	6	1	1	1	2	12	2012	#NULL!	0	0	#NULL!	1	#NULL!	1	2	1	2	8	3	3	5	5	5	5	4	5	4	4	5	3	3	4	2	3	5	4
145	1	1	1	mei	1	1952	9030	30	1	168	90	2	2	6	1	1	2	0	12	2012	#NULL!	0	0	#NULL!	1	#NULL!	1	2	1	2	8	3	1	4	3	4	4	4	2	2	2	5	5	5	4	2	4	4	5
158	1	1	1	mei	1	1952	9000	33	1	167	44	2	2	6	1	2	3	2	6	2012	#NULL!	6	0	11	2	1	1	2	1	2	6	2	3	3	2	2	4	3	#NULL!	#NULL!	#NULL!	#NULL!	#NULL!	5	#NULL!	#NULL!	#NULL!	5	5
167	1	1	1	mei	1	1951	9000	23	1	158	58	1	2	6	1	4	0	0	12	2011	#NULL!	0	1	17	2	1	1	2	1	2	8	3	2	4	4	5	5	2	#NULL!	#NULL!	4	#NULL!	#NULL!	4	4	4	2	4	3
177	1	1	1	mei	1	1952	9000	20	1	152	70	2	3	7	0	1	2	0	10	2012	#NULL!	2	0	7	2	1	2	1	1	2	9	2	2	5	5	5	1	5	3	3	3	4	1	4	5	5	2	1	4
199	1	1	1	mei	1	1947	9052	40	1	164	67	2	1	7	2	1	2	3	3	2012	#NULL!	9	0	14	1	1	2	1	1	1	8	4	4	5	4	5	5	4	4	#NULL!	#NULL!	4	#NULL!	#NULL!	4	4	5	4	5
210	1	1	1	mei	1	1954	9000	38	1	158	74	2	2	6	1	1	1	2	1	2013	#NULL!	11	-1	#NULL!	2	1	1	2	1	2	7	3	2	4	3	4	5	3	4	4	4	4	4	4	5	5	3	5	4
241	1	1	1	december	1	1951	9052	4	1	160	63	2	1	6	0	3	3	0	3	2011	#NULL!	9	1	21	1	#NULL!	1	2	1	2	9	3	3	5	3	5	5	4	5	5	5	5	3	3	5	4	3	4	4
272	1	1	1	mei	1	1952	9030	20	1	167	50	2	1	6	1	1	2	0	3	2012	#NULL!	9	0	14	1	#NULL!	1	2	1	2	8	2	3	4	2	4	4	2	5	#NULL!	#NULL!	5	#NULL!	#NULL!	5	2	2	5	5
278	1	1	1	december	1	1952	9031	33	1	170	58	2	7	6	1	1	0	0	9	2012	#NULL!	3	0	#NULL!	1	#NULL!	1	2	1	1	8	2	3	5	4	4	5	5	5	5	5	5	5	4	5	2	4	4	5
288	1	1	1	mei	1	1950	9000	40	1	176	73	2	3	7	1	5	2	3	2	2012	#NULL!	10	0	15	2	1	1	2	1	1	5	2	1	4	3	4	2	4	1	4	4	1	3	1	5	3	4	4	5
293	1	1	1	mei	1	1954	9052	23	1	170	82	2	7	6	2	1	3	2	9	2012	#NULL!	3	0	8	2	1	1	2	1	2	7	3	2	4	4	4	5	4	4	5	4	4	5	4	5	4	3	4	4
297	1	1	1	december	1	1952	9041	28	1	168	68	2	7	6	2	1	2	4	12	2012	#NULL!	0	0	#NULL!	1	#NULL!	1	2	1	2	9	1	3	5	3	3	5	3	5	5	3	5	5	3	5	5	4	5	5
348	1	1	1	mei	1	1952	9000	25	1	171	81	1	1	7	1	3	0	0	2	2012	#NULL!	10	0	15	1	#NULL!	1	2	1	2	7	2	3	5	3	4	5	4	#NULL!	#NULL!	#NULL!	5	#NULL!	5	4	3	3	4	5
350	1	1	1	mei	1	1947	9050	3	1	161	47	2	2	6	1	3	3	6	1	2013	#NULL!	11	-1	#NULL!	1	#NULL!	2	1	2	2	8	2	3	4	2	#NULL!	#NULL!	#NULL!	#NULL!	5	#NULL!	#NULL!	5	#NULL!	4	2	4	5	5
353	1	1	1	mei	1	1952	9040	33	1	155	52	2	7	6	1	1	3	4	5	2012	#NULL!	7	0	12	1	#NULL!	1	2	1	2	7	3	3	3	2	4	4	3	1	1	1	5	4	4	5	3	4	4	4
365	1	1	1	mei	1	1949	9000	24	1	169	67	2	1	6	1	1	2	0	9	2012	#NULL!	3	0	8	1	#NULL!	2	1	1	2	6	2	3	4	3	4	4	4	1	1	4	4	3	4	5	4	4	4	4
371	1	1	1	mei	1	1953	9030	36	1	157	58	2	2	6	1	1	2	2	11	2011	#NULL!	1	1	18	2	1	1	2	1	2	4	3	3	3	3	4	5	2	#NULL!	#NULL!	#NULL!	5	5	5	5	1	5	4	5
383	1	1	1	mei	1	1951	9050	35	1	155	48	2	1	6	1	1	3	2	8	2011	#NULL!	4	1	21	1	#NULL!	1	2	1	2	7	2	3	5	5	5	5	4	2	2	2	4	4	4	4	2	5	4	5
384	1	1	1	mei	1	1954	9031	10	1	168	62	2	1	6	0	3	2	2	8	2011	#NULL!	4	1	21	2	2	1	2	1	1	8	4	2	5	5	5	5	3	5	5	#NULL!	4	4	#NULL!	5	4	2	5	4
385	1	1	1	december	1	1952	9000	4.5	1	178	84	2	1	6	1	1	0	0	2	2012	#NULL!	10	0	10	1	#NULL!	1	2	1	2	7	2	3	3	1	3	3	2	4	#NULL!	#NULL!	4	#NULL!	#NULL!	4	3	4	2	3
386	1	1	1	mei	1	1950	9000	55	1	162	63	2	3	7	1	1	1	2	7	2012	#NULL!	5	0	10	1	#NULL!	1	2	1	2	8	2	3	3	3	5	4	3	4	4	4	4	4	4	5	5	4	4	4
412	1	1	1	mei	1	1952	9040	36	1	164	59	1	2	6	1	1	2	3	6	2012	#NULL!	6	0	11	1	3	1	2	2	2	10	3	3	5	5	5	1	5	5	5	4	5	5	4	4	4	3	4	5
414	1	1	1	mei	1	1951	9051	30	1	159	52	2	7	7	1	3	1	3	5	2012	#NULL!	7	0	12	1	1	2	1	2	2	7	2	3	4	3	5	4	4	#NULL!	4	4	#NULL!	#NULL!	#NULL!	3	2	4	4	4
457	1	1	1	december	1	1948	9051	26	1	168	59	2	4	7	2	5	1	0	1	2011	#NULL!	11	1	23	1	#NULL!	1	2	1	1	7	3	3	4	3	4	4	4	5	4	5	5	4	5	5	2	5	5	5
458	1	1	1	december	1	1952	9050	36	1	163	54	2	1	7	2	1	3	3	3	2012	#NULL!	9	0	9	1	#NULL!	2	2	1	2	9	3	2	5	4	5	5	3	4	4	#NULL!	5	#NULL!	#NULL!	5	2	2	5	5
502	1	1	1	mei	1	1947	9000	35	1	160	61	2	7	6	0	2	2	0	7	2012	#NULL!	5	0	10	1	#NULL!	1	2	2	2	7	2	3	4	4	3	3	3	#NULL!	5	4	#NULL!	4	4	5	4	4	5	3
504	1	1	1	december	1	1951	9030	10	1	163	58	2	3	7	1	1	2	4	1	2011	#NULL!	11	1	23	1	#NULL!	2	1	1	2	8	2	3	5	4	5	5	5	1	1	1	1	1	1	5	1	1	5	4
512	1	1	1	mei	1	1948	9000	19	1	161	57	2	3	6	1	3	2	3	4	2013	#NULL!	8	-1	#NULL!	1	#NULL!	1	2	1	2	7	1	2	4	2	5	5	4	#NULL!	5	5	#NULL!	5	5	5	2	3	2	4
520	1	1	1	mei	1	1952	9040	18	2	172	66	1	2	6	2	1	1	0	9	2011	#NULL!	3	1	20	1	1	2	2	1	2	7	2	3	4	3	4	4	3	4	#NULL!	#NULL!	1	#NULL!	#NULL!	5	4	4	5	5
536	1	1	1	mei	1	1948	9031	35	1	168	52	2	5	7	1	1	2	3	5	2013	#NULL!	7	-1	#NULL!	1	#NULL!	1	2	1	2	9	4	3	4	4	5	5	5	5	5	5	5	5	#NULL!	5	5	5	5	5
[truncated: 430 more columns]
